# Supplementary material for: Development and validation of a&nbsp;health profession education-focused scholarly mentorship assessment tool
Source: Springer Nature journal article supplement (doi:10.1007/s40037-018-0491-0), 2019-01-10
Supplement: MOESM2 [file 16391786]

# Scholarly Teaching in Health Professions Education (STHPE)

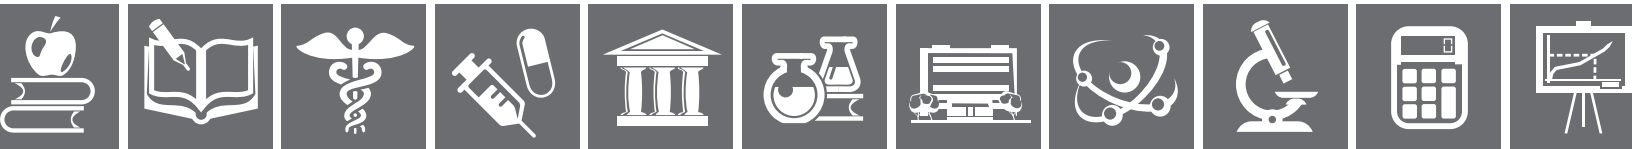

Many interactions that you have with \_\_\_\_\_ INSERT NAME \_\_\_\_\_ are likely not consistent traditional conceptions of university teaching.

For the purpose of this survey, we rely on the definition of "teaching" provided by the Oxford English Dictionary:  
**"to inform, to train, to give instruction to, to impart knowledge, to show by way, to instruct"**

Please refer to this definition as you complete this assessment form.

## PART I: SKILLS

Please indicate your level of agreement for each of the following statements, place an X in one box for each statement.

| #                                                     | Skills                                                                                                       | Totally disagree         | Somewhat disagree        | Somewhat agree           | Totally agree            | N/A                      |
|-------------------------------------------------------|--------------------------------------------------------------------------------------------------------------|--------------------------|--------------------------|--------------------------|--------------------------|--------------------------|
| <b>A Expertise in scientific or scholarly area(s)</b> |                                                                                                              |                          |                          |                          |                          |                          |
| A1                                                    | Makes complex concepts understandable.                                                                       | <input type="checkbox"/> | <input type="checkbox"/> | <input type="checkbox"/> | <input type="checkbox"/> | <input type="checkbox"/> |
| A2                                                    | Demonstrates expertise in Health Professions Education research.                                             | <input type="checkbox"/> | <input type="checkbox"/> | <input type="checkbox"/> | <input type="checkbox"/> | <input type="checkbox"/> |
| A3                                                    | Provides referrals to others whose expertise may be relevant to my scholarly area of interest.               | <input type="checkbox"/> | <input type="checkbox"/> | <input type="checkbox"/> | <input type="checkbox"/> | <input type="checkbox"/> |
| A4                                                    | Suggests literature (or references) that are pertinent to my areas of interest.                              | <input type="checkbox"/> | <input type="checkbox"/> | <input type="checkbox"/> | <input type="checkbox"/> | <input type="checkbox"/> |
| A5                                                    | Provides appropriate guidance for methodological choices.                                                    | <input type="checkbox"/> | <input type="checkbox"/> | <input type="checkbox"/> | <input type="checkbox"/> | <input type="checkbox"/> |
| <b>B Guidance in research and academic skills</b>     |                                                                                                              |                          |                          |                          |                          |                          |
| B1                                                    | Helps me formulate educational research question(s).                                                         | <input type="checkbox"/> | <input type="checkbox"/> | <input type="checkbox"/> | <input type="checkbox"/> | <input type="checkbox"/> |
| B2                                                    | Helps me with academic writing (e.g., grants, research proposals, ethics submissions, research papers, etc). | <input type="checkbox"/> | <input type="checkbox"/> | <input type="checkbox"/> | <input type="checkbox"/> | <input type="checkbox"/> |
| B3                                                    | Works with me through research-related challenges in a concrete way.                                         | <input type="checkbox"/> | <input type="checkbox"/> | <input type="checkbox"/> | <input type="checkbox"/> | <input type="checkbox"/> |
| B4                                                    | Helps me think of my work more critically / analytically.                                                    | <input type="checkbox"/> | <input type="checkbox"/> | <input type="checkbox"/> | <input type="checkbox"/> | <input type="checkbox"/> |
| B5                                                    | Has a positive impact on my approach to research in health professions education.                            | <input type="checkbox"/> | <input type="checkbox"/> | <input type="checkbox"/> | <input type="checkbox"/> | <input type="checkbox"/> |

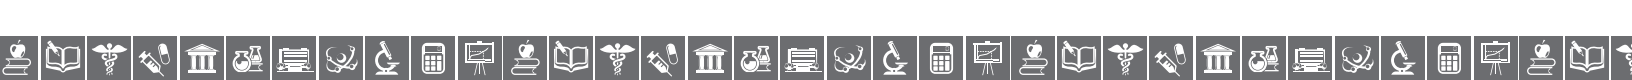

## PART I: SKILLS

| #                                                                                               | Skills                                                                                                                   | Totally disagree         | Somewhat disagree        | Somewhat agree           | Totally agree            | N/A                      |
|-------------------------------------------------------------------------------------------------|--------------------------------------------------------------------------------------------------------------------------|--------------------------|--------------------------|--------------------------|--------------------------|--------------------------|
| <b>C Development of a feasible, coordinated research plan</b>                                   |                                                                                                                          |                          |                          |                          |                          |                          |
| C1                                                                                              | Provides valuable feedback on my scholarly work.                                                                         | <input type="checkbox"/> | <input type="checkbox"/> | <input type="checkbox"/> | <input type="checkbox"/> | <input type="checkbox"/> |
| C2                                                                                              | Helps me design feasible research projects.                                                                              | <input type="checkbox"/> | <input type="checkbox"/> | <input type="checkbox"/> | <input type="checkbox"/> | <input type="checkbox"/> |
| C3                                                                                              | Guides me in conducting feasible research projects.                                                                      | <input type="checkbox"/> | <input type="checkbox"/> | <input type="checkbox"/> | <input type="checkbox"/> | <input type="checkbox"/> |
| C4                                                                                              | Helps me design a coordinated program of research.                                                                       | <input type="checkbox"/> | <input type="checkbox"/> | <input type="checkbox"/> | <input type="checkbox"/> | <input type="checkbox"/> |
| C5                                                                                              | Motivates me to look for research opportunities in my daily education activities that align with my program of research. | <input type="checkbox"/> | <input type="checkbox"/> | <input type="checkbox"/> | <input type="checkbox"/> | <input type="checkbox"/> |
| <b>D Provision of support in terms of : resources, motivation, and professional development</b> |                                                                                                                          |                          |                          |                          |                          |                          |
| D1                                                                                              | Fosters my scholarly independence.                                                                                       | <input type="checkbox"/> | <input type="checkbox"/> | <input type="checkbox"/> | <input type="checkbox"/> | <input type="checkbox"/> |
| D2                                                                                              | Discusses long-term research goals with me.                                                                              | <input type="checkbox"/> | <input type="checkbox"/> | <input type="checkbox"/> | <input type="checkbox"/> | <input type="checkbox"/> |
| D3                                                                                              | Provides me with opportunities to build on prior successes.                                                              | <input type="checkbox"/> | <input type="checkbox"/> | <input type="checkbox"/> | <input type="checkbox"/> | <input type="checkbox"/> |
| <b>E Provision of support in terms of : networking, visibility, and opportunities</b>           |                                                                                                                          |                          |                          |                          |                          |                          |
| E1                                                                                              | Supports me in identifying potential resources to further my scholarly work.                                             | <input type="checkbox"/> | <input type="checkbox"/> | <input type="checkbox"/> | <input type="checkbox"/> | <input type="checkbox"/> |
| E2                                                                                              | Provides me with networking opportunities that support my scholarly efforts.                                             | <input type="checkbox"/> | <input type="checkbox"/> | <input type="checkbox"/> | <input type="checkbox"/> | <input type="checkbox"/> |
| E3                                                                                              | Promotes my accomplishments to others.                                                                                   | <input type="checkbox"/> | <input type="checkbox"/> | <input type="checkbox"/> | <input type="checkbox"/> | <input type="checkbox"/> |
| <b>F Provision of support in terms of : communicating findings</b>                              |                                                                                                                          |                          |                          |                          |                          |                          |
| F1                                                                                              | Helps me identify the most appropriate venues (e.g. conferences) for presenting my work.                                 | <input type="checkbox"/> | <input type="checkbox"/> | <input type="checkbox"/> | <input type="checkbox"/> | <input type="checkbox"/> |
| F2                                                                                              | Helps me prepare for oral presentations and/or posters.                                                                  | <input type="checkbox"/> | <input type="checkbox"/> | <input type="checkbox"/> | <input type="checkbox"/> | <input type="checkbox"/> |
| F3                                                                                              | Helps me identify the most appropriate journals for my work.                                                             | <input type="checkbox"/> | <input type="checkbox"/> | <input type="checkbox"/> | <input type="checkbox"/> | <input type="checkbox"/> |
| F4                                                                                              | Helps me prepare and publish my work.                                                                                    | <input type="checkbox"/> | <input type="checkbox"/> | <input type="checkbox"/> | <input type="checkbox"/> | <input type="checkbox"/> |

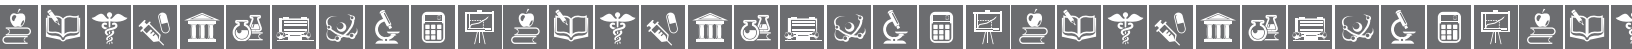

## PART II: SATISFACTION

On a scale of 0 to 10, please indicate your level of overall satisfaction in your interactions with

\_\_\_\_\_ INSERT NAME \_\_\_\_\_ up to now.       0    1    2    3    4    5    6    7    8    9    10  
(0 = Extremely dissatisfied to 10 = Extremely satisfied)

Would you recommend working with \_\_\_\_\_ INSERT NAME \_\_\_\_\_ to your colleagues?      Yes    No

## PART III: BACKGROUND QUESTIONS / SOCIO-DEMOGRAPHIC INFORMATION

1

Please indicate the steps completed to date for the research project you are currently working on with \_\_\_\_\_ INSERT NAME \_\_\_\_\_ . [Please indicate all applicable responses by placing an X in the corresponding box(es).]

| Step # | Project Step                   | Started                  | Completed                |
|--------|--------------------------------|--------------------------|--------------------------|
| 1      | Literature Review              | <input type="checkbox"/> | <input type="checkbox"/> |
| 2      | Defining the Research Question | <input type="checkbox"/> | <input type="checkbox"/> |
| 3      | Writing the Research Protocol  | <input type="checkbox"/> | <input type="checkbox"/> |
| 4      | Ethics Application             | <input type="checkbox"/> | <input type="checkbox"/> |
| 5      | Data Collection                | <input type="checkbox"/> | <input type="checkbox"/> |
| 6      | Data analysis                  | <input type="checkbox"/> | <input type="checkbox"/> |
| 7      | Interpretation of Results      | <input type="checkbox"/> | <input type="checkbox"/> |
| 8      | Dissemination                  | <input type="checkbox"/> | <input type="checkbox"/> |

2

Is this your first health profession education project with \_\_\_\_\_ INSERT NAME \_\_\_\_\_ ?      Yes    No    No current project

3

How many projects are currently on-going with \_\_\_\_\_ INSERT NAME \_\_\_\_\_  ?

4

How many previous projects have you undertaken in health profession education?

5

Please provide the following socio-demographic information:

i) Your current academic rank  
[Choose only one response by putting an X in the corresponding box.]

- Assistant Professor
- Associate Professor
- Full Professor
- Resident
- Medical student
- Other (please specify):

ii) Your clinical affiliation/department/program [ \_\_\_\_\_ ].

iii) Level of education

[Please indicate all applicable responses by placing an X in the corresponding box(es).]

- MD  Specify discipline: \_\_\_\_\_
- MEd  \_\_\_\_\_
- MSc/MA  Specify discipline: \_\_\_\_\_
- PhD  Specify discipline: \_\_\_\_\_
- Other  Specify: \_\_\_\_\_

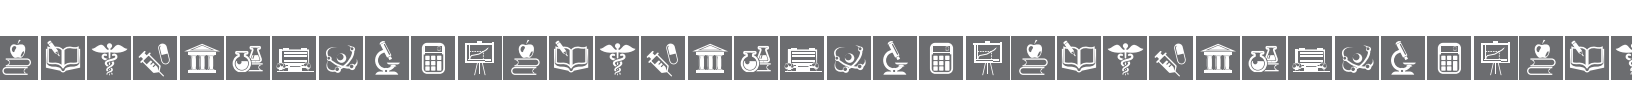

### PART III: BACKGROUND QUESTIONS / SOCIO-DEMOGRAPHIC INFORMATION

6

What aspects of your interactions with \_\_\_\_\_ INSERT NAME \_\_\_\_\_ were key to the progress of your scholarly project?

7

Any other general comments

Thank you for taking the time to complete this evaluation.

Version anglaise : Scholarly Teaching in Health Professions Education (STHPE)  
Lara Varpio, PhD, Meredith Young, PhD, & Christina St-Onge, PhD
